# Supplementary material for: Screening of Lactiplantibacillus plantarum with High Stress Tolerance and High Esterase Activity and Their Effect on Promoting Protein Metabolism and Flavor Formation in Suanzhayu, a Chinese Fermented Fish
Source: MDPI journal article supplement (doi:10.3390/foods11131932), 2022-06-29
Supplement: s1 [file s1]

## Supplementary Materials

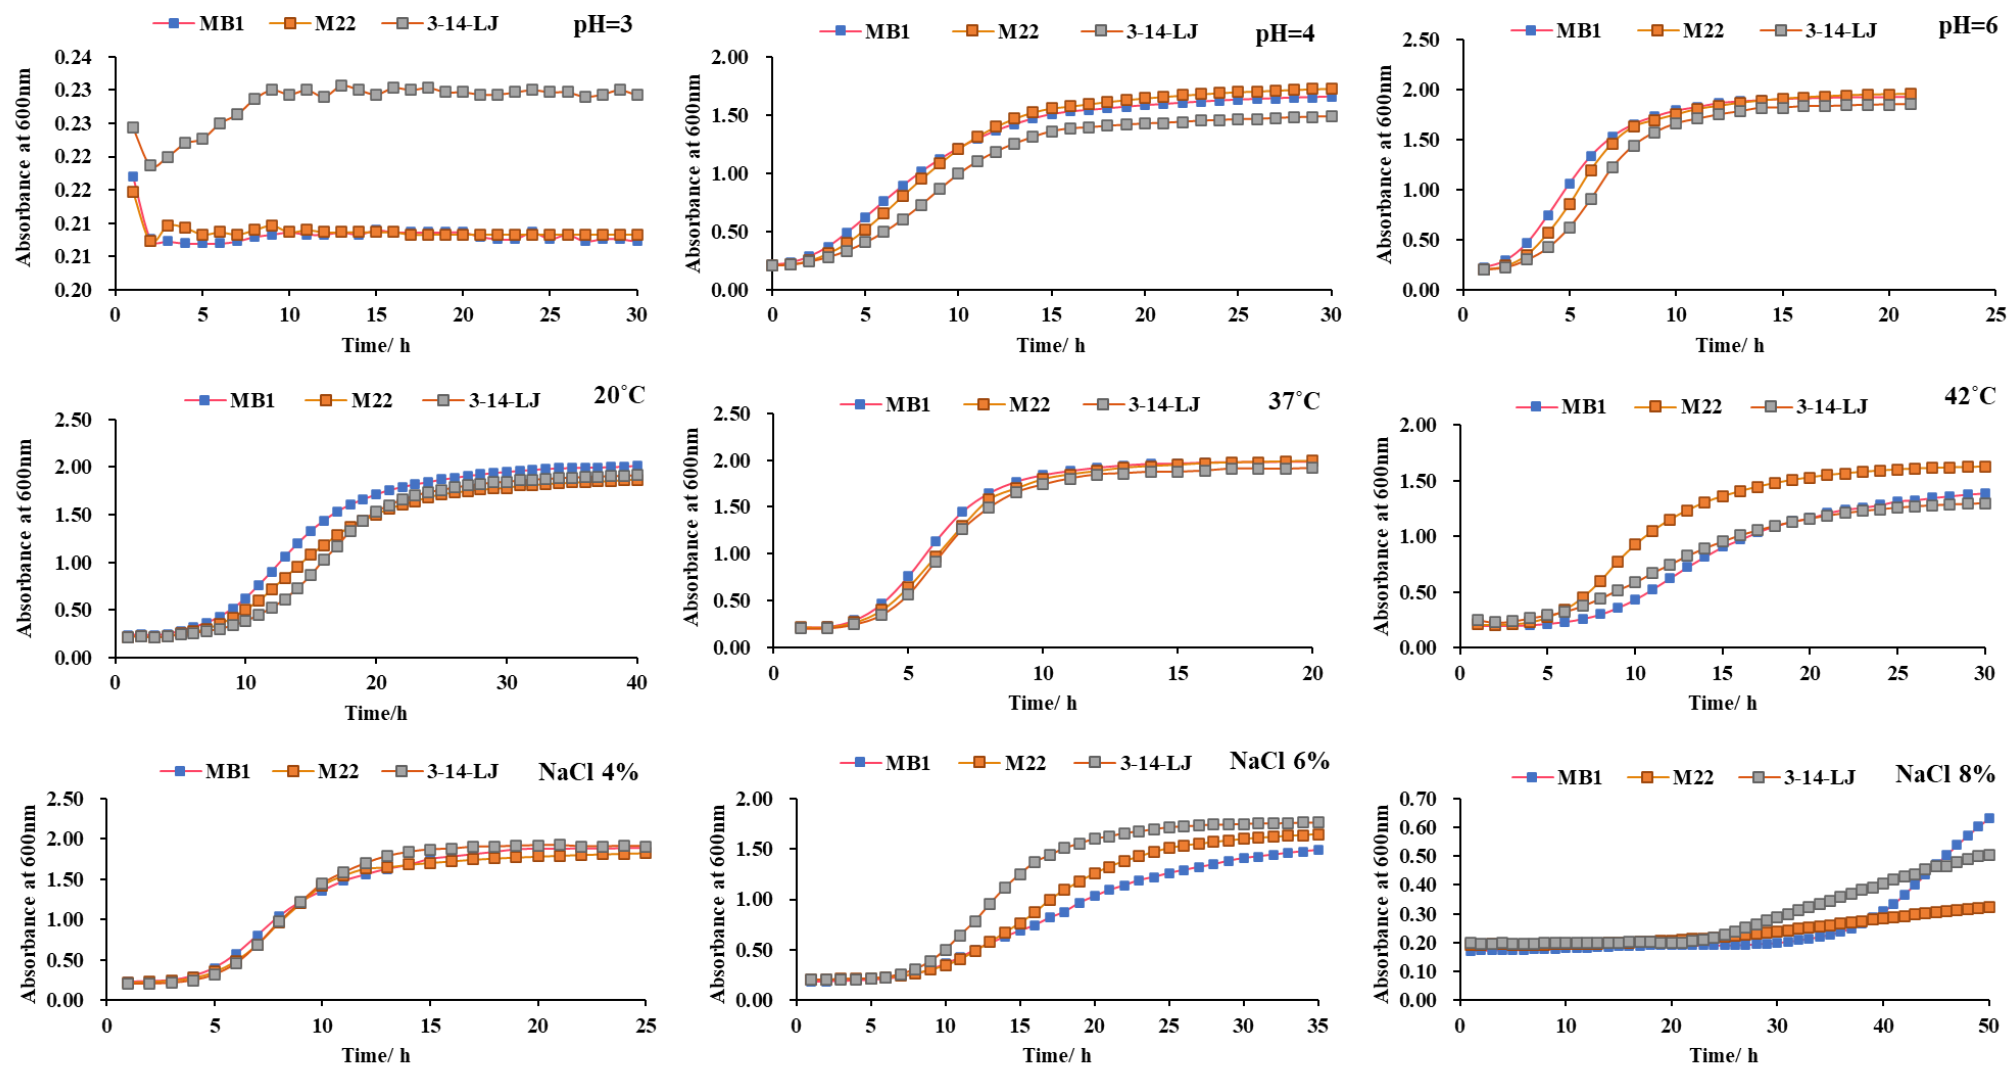

**Figure S1** Growth characteristics of *L. plantarum* M22, MB1 and 3-14-LJ in different pH, temperature and NaCl concentrations.

**Table S1** Contents of volatile compounds in model system of *Suanzhayu*.

|                             | Content (µg/100 g)        |                           |                           |                           |                            | Identification method |
|-----------------------------|---------------------------|---------------------------|---------------------------|---------------------------|----------------------------|-----------------------|
|                             | MF                        | MC                        | M3                        | M2                        | M1                         |                       |
| <b>alcohols</b>             |                           |                           |                           |                           |                            |                       |
| 2-ethyl-1-hexanol           | 120.57±8.97               | 30.36±6.06                | 42.31±5.81                | 193.01±21.81              | 78.47±16.68                | MS/RI                 |
| 1-cexanol                   | 62.10±7.93                | 109.86±14.16              | 417.53±55.25              | 286.68±17.5               | 316.90±18.76               | MS/RI                 |
| 5-octen-1-ol                | 3.3±0.41                  | 5.63±0.71                 | 6.78±2.75                 | 15.94±1                   | 14.46±2.65                 | MS/RI                 |
| 1-octanol                   | 6.34±1.06                 | 8.36±0.93                 | 25.30±16.65               | 55.83±1.71                | 70.34±8.05                 | MS/RI                 |
| 1-nonanol                   | 3.76±0.17                 | 10.55±1.85                | 24.33±17.09               | 40.59±4.37                | 67.53±15.14                | MS/RI                 |
| 1-octen-3-ol                | 45.75±3.71                | 95.05±13.10               | 97.70±10.12               | 125.82±21.57              | 119.01±6.53                | MS/RI                 |
| 2-butyl-1-octanol           | ND                        | ND                        | 2.56±2.30                 | ND                        | ND                         |                       |
| subtotal                    | 241.85±6.64 <sup>c</sup>  | 259.80±12.38 <sup>c</sup> | 616.52±17.70 <sup>b</sup> | 717.87±64.94 <sup>a</sup> | 666.71±67.27 <sup>ab</sup> |                       |
| <b>aldehydes</b>            |                           |                           |                           |                           |                            |                       |
| hexanal                     | 118.58±15.7               | 347.03±38.97              | 292.09±10.6               | 433.51±52.05              | 292.7±18.73                | MS/RI                 |
| octanal                     | 12.25±1.66                | 9.73±1.59                 | 28.43±6.67                | 38.83±10.17               | 37.34±4.65                 | MS/RI                 |
| nonanal                     | 48.18±4.9                 | 35.18±3.68                | 58.72±7.08                | 110.38±4.49               | 84.36±7.55                 | MS/RI                 |
| heptanal                    | 6.88±0.88                 | ND                        | 9.77±6.15                 | 10.83±1.86                | 8.76±1.87                  | MS/RI                 |
| 3-butylacrolein             | 3.25±0.52                 | 20.22±0.86                | 21.43±1.17                | 25.24±0.55                | 23.3±0.76                  | MS/RI                 |
| (e)-2-nonenal               | 2.23±0.21                 | 8.96±1.14                 | 14.58±3.99                | 33.77±0.95                | 31.75±1.79                 | MS/RI                 |
| 2,4-noadienal               | ND                        | ND                        | 4.81±1.82                 | ND                        | ND                         | MS/RI                 |
| 2,5-dimethyl-benzaldehyde   | ND                        | ND                        | ND                        | 65.95±1.61                | ND                         | MS/RI                 |
| (e, e)-2,4-decadienal       | ND                        | 4.74±1.68                 | 5.8±0.83                  | 11.8±0.63                 | 11.88±1.77                 | MS/RI                 |
| 2-undecenal                 | ND                        | ND                        | 7.39±3.83                 | 11.79±1.22                | 12.86±2.24                 | MS/RI                 |
| 2,4-dimethyl-benzaldehyde   | ND                        | ND                        | ND                        | ND                        | 33.53±4.7                  | MS/RI                 |
| (e)-2-decenal               | ND                        | 3.13±0.88                 | 12.58±4.74                | 18.95±0.89                | 25.77±2.05                 | MS/RI                 |
| subtotal                    | 191.39±21.63 <sup>d</sup> | 428.99±44.68 <sup>c</sup> | 445.62±19.49 <sup>c</sup> | 761.07±66.00 <sup>a</sup> | 562.22±28.25 <sup>b</sup>  |                       |
| <b>esters</b>               |                           |                           |                           |                           |                            |                       |
| formic acid hept-2-yl ester | 4.19±0.28                 | 6.64±0.17                 | 16.65±6.03                | 23.58±2.63                | 31.77±2.68                 | MS/RI                 |
| allyl 2-ethyl butytate      | 17.93±2.36                | 12.42±5.49                | ND                        | ND                        | ND                         | MS/RI                 |
| isoamyl acetate             | ND                        | ND                        | 6.05±0.31                 | 8.82±0.27                 | 4.38±0.26                  | MS/RI/S               |
| ethyl hexanoate             | ND                        | ND                        | 1.85±0.23                 | 2.17±0.25                 | ND                         | MS/RI/S               |
| ethyl octanoate             | ND                        | ND                        | 1.44±0.09                 | 1.72±0.13                 | 1.48±0.06                  | MS/RI/S               |
| subtotal                    | 22.12±2.59 <sup>b</sup>   | 19.50±5.61 <sup>b</sup>   | 26.00±6.50 <sup>b</sup>   | 36.29±2.55 <sup>a</sup>   | 37.63±2.83 <sup>a</sup>    |                       |

|                                    |                           |                           |                            |                              |                             |       |
|------------------------------------|---------------------------|---------------------------|----------------------------|------------------------------|-----------------------------|-------|
| <b>ketones</b>                     |                           |                           |                            |                              |                             |       |
| 3,5,5-trimethyl-2-cyclohexen-1-one | ND                        | ND                        | ND                         | 8.45±0.59                    | 4.83±1.35                   | MS/RI |
| subtotal                           | ND                        | ND                        | ND                         | 8.45±0.59 <sup>a</sup>       | 4.83±1.35 <sup>b</sup>      |       |
| <b>alkanes</b>                     |                           |                           |                            |                              |                             |       |
| 2,6,11-trimethyldodecane           | ND                        | ND                        | 3.40±1.51                  | ND                           | ND                          | MS/RI |
| pentadecane                        | ND                        | ND                        | ND                         | 4.38±0.91                    | 4.57±1.37                   | MS/RI |
| 2-methyldecane                     | ND                        | 3.00±2.22                 | ND                         | 6.55±0.21                    | 3.32±0.73                   | MS/RI |
| subtotal                           | ND                        | 3.00±2.22 <sup>c</sup>    | 3.40±1.51 <sup>c</sup>     | 10.93±0.94 <sup>a</sup>      | 7.89±2.07 <sup>b</sup>      |       |
| <b>acids</b>                       |                           |                           |                            |                              |                             |       |
| palmitic acid                      | ND                        | ND                        | ND                         | 24.53±14.79                  | ND                          | MS/RI |
| oleic acid                         | ND                        | ND                        | ND                         | 12.87±8.13                   | ND                          | MS/RI |
| subtotal                           | ND                        | ND                        | ND                         | 37.40±22.56 <sup>a</sup>     | ND                          |       |
| <b>others</b>                      |                           |                           |                            |                              |                             |       |
| 2,5-dimethylcyclohexanol           | ND                        | 15.78±1.12                | 9.22±1.84                  | 12.37±0.87                   | 16.92±4.16                  | MS/RI |
| 1,3-ditertiarybutylbenzene         | ND                        | 19.29±1.14                | 25.32±8.87                 | ND                           | ND                          | MS/RI |
| 2-pentylfuran                      | 14.22±0.80                | 15.56±2.68                | 45.93±10.64                | 115.18±6.64                  | 98.57±9.68                  | MS/RI |
| 2,6-dimethylnonane                 | 5.88±0.50                 | ND                        | 4.21±1.31                  | ND                           | ND                          | MS/RI |
| subtotal                           | 20.1±1.27 <sup>a</sup>    | 50.63±2.38 <sup>c</sup>   | 84.67±19.89 <sup>b</sup>   | 127.55±6.96 <sup>a</sup>     | 115.50±5.53 <sup>a</sup>    |       |
| <b>total</b>                       | 475.49±31.71 <sup>c</sup> | 761.48±25.09 <sup>d</sup> | 1186.21±51.83 <sup>c</sup> | 1691.12±152.16 <sup>aa</sup> | 1389.99±101.16 <sup>b</sup> |       |

“ND”: not detected. Abbreviations see Table 1. Letters “a-e” indicate the significant difference ( $P < 0.05$ ).

Identification based on Nist 11 mass spectral database; published retention indices; authentic standards

**Table S2** Contents of volatile compounds in actual system of *Suanzhayu*.

|                                     | Content (mg/100g)          |                              |                              |                              |                             | Identification method |
|-------------------------------------|----------------------------|------------------------------|------------------------------|------------------------------|-----------------------------|-----------------------|
|                                     | AF                         | AC                           | A3                           | A2                           | A1                          |                       |
| <b>alcohols</b>                     |                            |                              |                              |                              |                             |                       |
| 1-pentanol                          | ND                         | ND                           | 202.58±97.51                 | ND                           | ND                          | MS/RI                 |
| 2,3-butanediol                      | ND                         | ND                           | 64.83±36.29                  | 769±10.25                    | 334.59±175.25               | MS/RI                 |
| 2,2-dimethyl-1-butanol              | ND                         | ND                           | ND                           | 94.09±86.23                  | ND                          | MS/RI                 |
| 2-hexanol                           | 115.98±90.88               | ND                           | ND                           | 1329.76±1201.64              | 588.85±337                  | MS/RI                 |
| 1-hexanol                           | ND                         | 114.64±82.29                 | ND                           | 151.83±82.86                 | 87.81±21.28                 | MS/RI                 |
| 3-methyl-2-hexanol,                 | ND                         | ND                           | 68.76±53.1                   | ND                           | 112.72±46.35                | MS/RI                 |
| (e)-2-octenal                       | ND                         | ND                           | 55.78±3.77                   | 42.32±16.73                  | 73.96±38.98                 | MS/RI                 |
| 1-octen-3-ol                        | 82.19±14.46                | 322.58±23.69                 | 445.5±189.41                 | 243.33±170.56                | 425.78±77.86                | MS/RI                 |
| 3-octanol                           | ND                         | 63.06±22.98                  | 53.04±17                     | 58.72±57.94                  | ND                          | MS/RI                 |
| 2-ethyl-1-hexanol                   | 244.34±92.24               | 861.69±248.82                | 552.58±118.29                | 1186.8±349.88                | 756.97±150.47               | MS/RI                 |
| subtotal                            | 442.51±135.53 <sup>c</sup> | 1361.96±331.82 <sup>bc</sup> | 1240.48±352.34 <sup>bc</sup> | 3708.76±1218.53 <sup>a</sup> | 2380.68±671.46 <sup>b</sup> |                       |
| <b>alkanes</b>                      |                            |                              |                              |                              |                             |                       |
| 3,5,5-trimethyl-1-hexene            | ND                         | 184.73±10.91                 | ND                           | ND                           | ND                          | MS/RI                 |
| 2-methyl-1-octene                   | 62.12±40.24                | ND                           | 308.38±58.77                 | ND                           | 118.83±95.24                | MS/RI                 |
| 2,2-dimethyl-heptane                | ND                         | 282.67±203.09                | 1374.89±317.59               | ND                           | 199.57±74.68                | MS/RI                 |
| hexadecanal                         | ND                         | ND                           | 33.05±8.68                   | 47.64±20.88                  | ND                          | MS/RI                 |
| subtotal                            | 62.12±40.24 <sup>c</sup>   | 467.4±214 <sup>b</sup>       | 1716.33±318.05 <sup>a</sup>  | 47.64±20.88 <sup>c</sup>     | 318.4±165.99 <sup>bc</sup>  |                       |
| <b>esters</b>                       |                            |                              |                              |                              |                             |                       |
| 2-methoxy acetate                   | ND                         | ND                           | 259.53±327.25                | 522.63±260.3                 | ND                          | MS/RI                 |
| isobutyl acetate                    | ND                         | 78.02±48.11                  | ND                           | 73.33±16.88                  | ND                          | MS/RI                 |
| 2-methyl-propanoic acid ethyl ester | ND                         | ND                           | 480.29±455.8                 | 225.32±168.58                | ND                          | MS/RI                 |
| methyl 2-methylbutyrate             | ND                         | ND                           | ND                           | 232.94±284.66                | ND                          | MS/RI                 |
| 1-lactic acid ethyl ester           | ND                         | 1295.23±823.3                | 411.82±256.14                | 859.81±414.2                 | ND                          | MS/RI                 |
| 2-methoxy ethyl acetate             | ND                         | 572.28±313.36                | 75.82±87.39                  | 415.33±613.92                | 530.31±79.42                | MS/RI                 |
| butyl acetate                       | ND                         | 164.06±43.89                 | ND                           | 96.14±83.75                  | 682.59±698.3                | MS/RI                 |
| 2-ethylhexyl acetate                | ND                         | 126.64±96.22                 | 25.78±7.99                   | 42.22±6.64                   | ND                          | MS/RI                 |
| hexyl acetate                       | ND                         | ND                           | 25.01±4.19                   | ND                           | ND                          | MS/RI                 |
| 3-methylbutyl 2-methylprop-2-enoate | ND                         | 119.75±62.25                 | 52.18±35.65                  | 60.2±29.37                   | 128.03±145.43               | MS/RI                 |
| formic acid 1-propen-2-yl ester     | ND                         | ND                           | 33.33±8.67                   | ND                           | 48.23±33.8                  | MS/RI                 |

|                                        |                             |                              |                              |                               |                             |         |
|----------------------------------------|-----------------------------|------------------------------|------------------------------|-------------------------------|-----------------------------|---------|
| fumaric acid decyl 3-oxobut-2-yl ester | ND                          | ND                           | ND                           | 34.87±13.96                   | ND                          | MS/RI   |
| 2-methylpentyl formate                 | ND                          | ND                           | 318.04±279.84                | 88.61±94.07                   | ND                          | MS/RI   |
| allyl butyrate                         | 105.63±31.83                | ND                           | ND                           | 373.95±106.24                 | 345.98±119.34               | MS/RI   |
| isoamyl acetate                        | ND                          | 271.08±4.15                  | 117.55±5.75                  | 205.05±0.39                   | 64.64±0.23                  | MS/RI/S |
| ethyl caproate                         | ND                          | 191.27±088                   | 61.55±0.48                   | 68.26±0.37                    | 47.10±0.19                  | MS/RI/S |
| ethyl octanoate                        | ND                          | ND                           | 36.58±0.61                   | 67.39±0.78                    | 13.33±0.26                  | MS/RI/S |
| subtotal                               | 105.63±31.83 <sup>b</sup>   | 2818.33±781.56 <sup>a</sup>  | 1938.83±847.51 <sup>a</sup>  | 3366.07±1087.28 <sup>a</sup>  | 1860.21±716.21 <sup>a</sup> |         |
| <b>aldehydes</b>                       |                             |                              |                              |                               |                             |         |
| hexanal                                | 741.7±220.8                 | 709.66±394.29                | 1602.57±294.17               | ND                            | ND                          | MS/RI   |
| benzaldehyde                           | ND                          | ND                           | 36.52±13.64                  | 45.17±14.69                   | ND                          | MS/RI   |
| octanal                                | 37.32±15.06                 | 48.37±12.28                  | 168.96±37.52                 | 65.18±33.46                   | ND                          | MS/RI   |
| nonanal                                | 147.72±41.2                 | 112.07±9.65                  | 576.16±173.99                | 395.83±112.27                 | 595.62±90.29                | MS/RI   |
| subtotal                               | 926.75±169.16 <sup>b</sup>  | 870.1±391.66 <sup>b</sup>    | 2384.21±380.23 <sup>a</sup>  | 506.17±155.74 <sup>b</sup>    | 595.62±90.29 <sup>b</sup>   |         |
| <b>ketones</b>                         |                             |                              |                              |                               |                             |         |
| 3-hexanone                             | ND                          | 124.84±45.24                 | ND                           | ND                            | ND                          | MS/RI   |
| 3-octanone                             | ND                          | ND                           | 260.04±17.56                 | ND                            | ND                          | MS/RI   |
| subtotal                               | ND                          | 124.84±45.24 <sup>b</sup>    | 260.04±17.56 <sup>a</sup>    | ND                            | ND                          |         |
| <b>acids</b>                           |                             |                              |                              |                               |                             |         |
| palmitic acid                          | 128.54±124.96               | 38.69±9.53                   | ND                           | 1034.72±502.13                | ND                          | MS/RI   |
| oleic acid                             | ND                          | ND                           | ND                           | 236.06±237.07                 | ND                          | MS/RI   |
| subtotal                               | 128.54±124.96 <sup>b</sup>  | 38.69±9.53 <sup>b</sup>      | ND                           | 1270.78±658.20 <sup>a</sup>   | ND                          |         |
| <b>others</b>                          |                             |                              |                              |                               |                             |         |
| 2-(2-pentenyl) furan                   | ND                          | 40.8±1.71                    | 41±3.38                      | ND                            | ND                          | MS/RI   |
| 2-pentyl- furan                        | 24.05±14.26                 | 123.02±43.24                 | 447.7±175.86                 | 110.9±80.33                   | 468.72±120.19               | MS/RI   |
| diethyl-cyanamid                       | 68.31±77.65                 | ND                           | ND                           | ND                            | ND                          | MS/RI   |
| acetoin                                | ND                          | ND                           | 2071.17±409.1                | 1921.49±493.35                | 1632.42±825.95              | MS/RI   |
| 3-methyl-butanoic acid                 | ND                          | 35.77±2.69                   | 62.77±14.11                  | 308.95±402.59                 | 109.91±51                   | MS/RI   |
| 1-chloro-octane                        | ND                          | ND                           | 38.33±9.56                   | ND                            | ND                          | MS/RI   |
| subtotal                               | 92.36±91.72 <sup>b</sup>    | 199.60±42.26 <sup>b</sup>    | 2660.97±567.16 <sup>a</sup>  | 2341.34±755.01 <sup>a</sup>   | 2211.05±756.37 <sup>a</sup> |         |
| <b>total</b>                           | 1757.91±101.08 <sup>c</sup> | 5880.93±1387.56 <sup>b</sup> | 10403.45±917.18 <sup>a</sup> | 11240.77±1706.70 <sup>a</sup> | 7365.95±417.95 <sup>b</sup> |         |

“ND”: not detected. Abbreviations see Table 1. Letters “a-d” indicate the significant difference ( $P < 0.05$ ).

Identification based on Nist 11 mass spectral database; published retention indices; authentic standards
